# Supplementary material for: A Statistical Method for the Detection of Alternative Splicing Using RNA-Seq
Source: PLOS journal article supplement (doi:10.1371/journal.pone.0008529), 2010-01-08

# Human (read=27bp, junction=46bp)

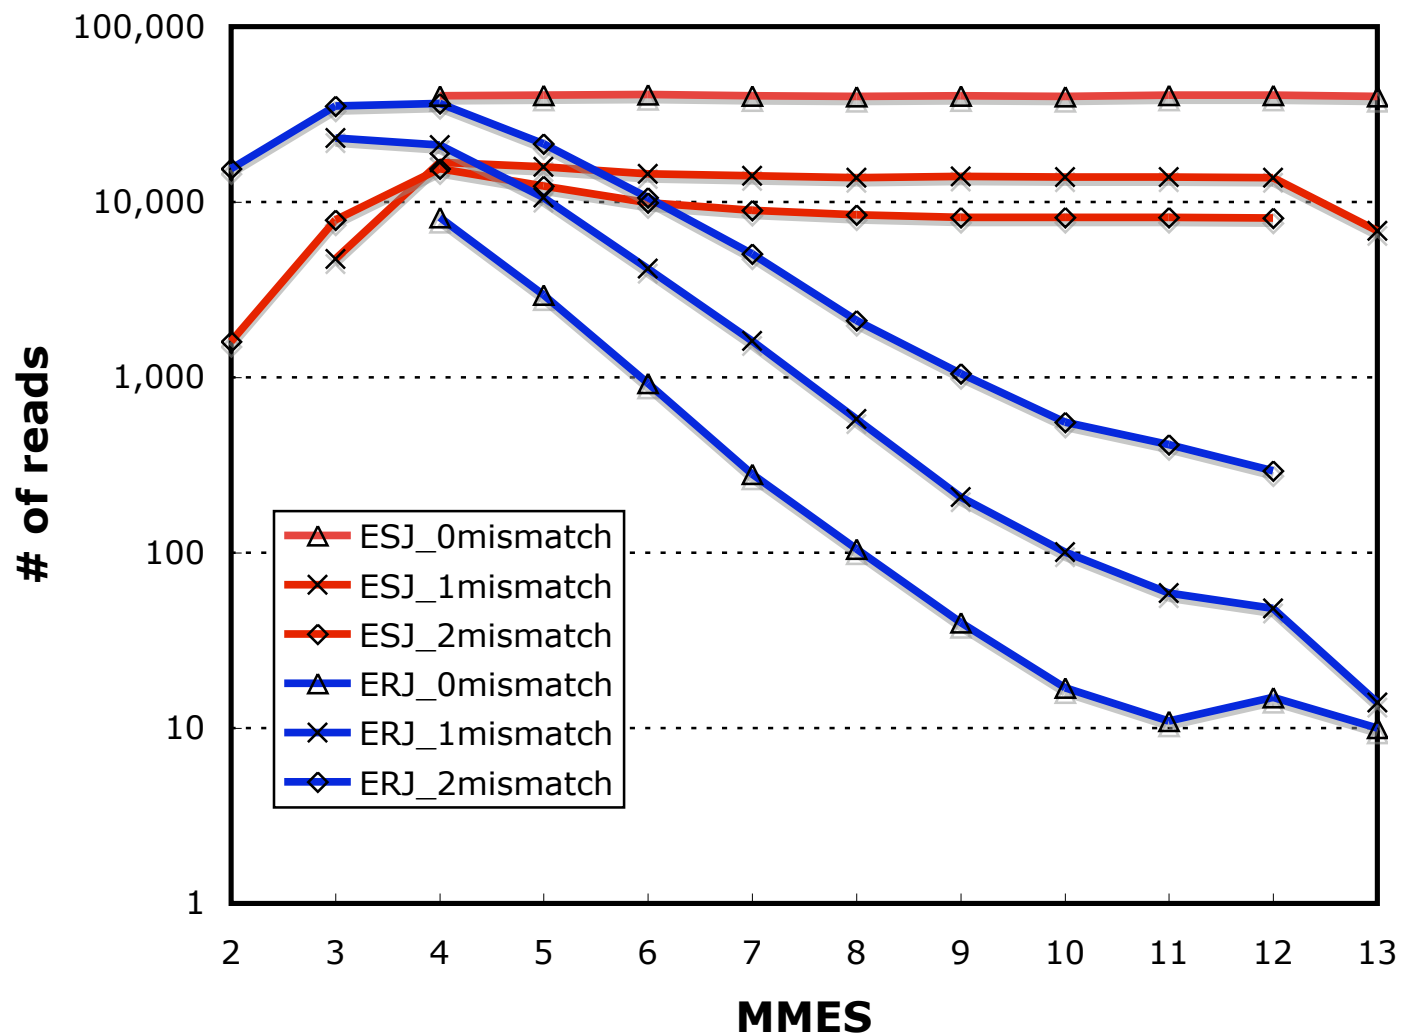

Supplement: S1 (10.1371/journal.pone.0008529.s001) [file journal.pone.0008529.s001]
