# Supplementary material for: A Statistical Method for the Detection of Alternative Splicing Using RNA-Seq
Source: PLOS journal article supplement (doi:10.1371/journal.pone.0008529), 2010-01-08

coverage of non-consecutive junctions

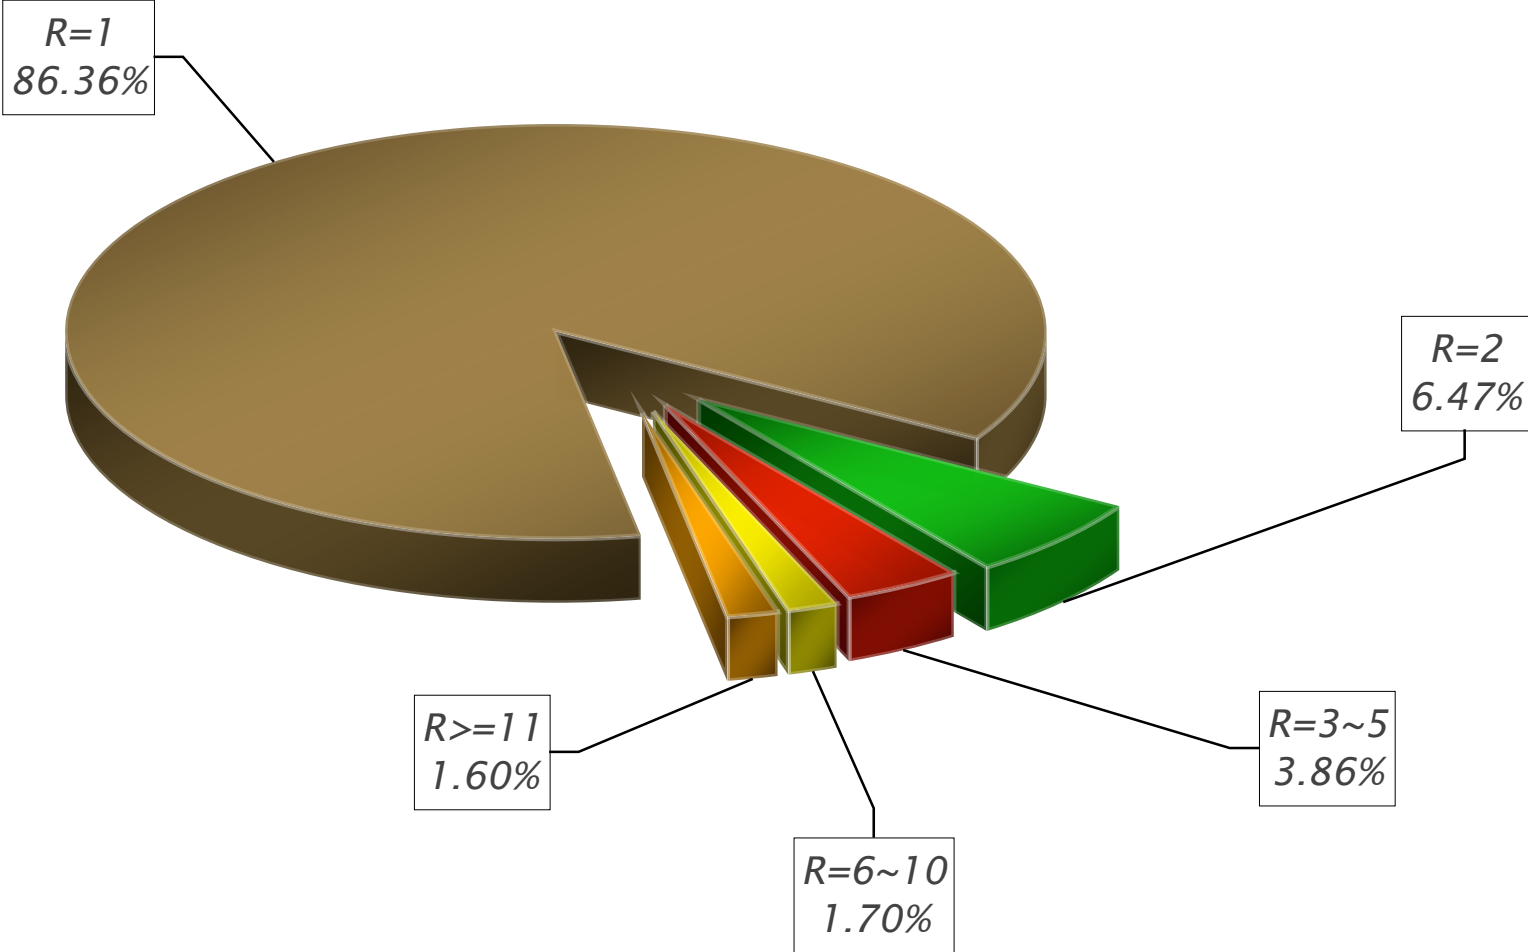

Supplement: S3 (10.1371/journal.pone.0008529.s003) [file journal.pone.0008529.s003]
